# Supplementary material for: The glass phase in the grain boundary of Na3Zr2Si2PO12, created by gallium modulation
Source: Royal Society of Chemistry journal article supplement (doi:10.1039/d3sc06578b), 2024-01-01
Supplement: d3sc06578b1.pdf [file d3sc06578b1.pdf]

## Supporting Information

### **Peeking the Glass Phase in the Grain Boundary of $\text{Na}_3\text{Zr}_2\text{Si}_2\text{PO}_{12}$ by Gallium**

#### **Modulation**

Chenjie Lou,<sup>a</sup> Wenda Zhang,<sup>a,b</sup> Jie Liu,<sup>a</sup> Yanan Gao,<sup>a</sup> Xuan Sun,<sup>a,c</sup> Jipeng Fu,<sup>c,d</sup> Yongchao Shi,<sup>a</sup> Ligang Xu,<sup>a</sup> Huajie Luo,<sup>c</sup> Yongjin Chen,<sup>a</sup> Xiang Gao,<sup>a</sup> Xiaojun Kuang,<sup>b</sup> Lei Su,<sup>a</sup> and Mingxue Tang\*<sup>a,e</sup>

*a. Center for High Pressure Science and Technology Advanced Research, Beijing 100193, China. E-mail: mingxue.tang@hpstar.ac.cn*

*b. College of Materials Science and Engineering, Guilin University of Technology, Guilin 541004, China.*

*c. China Key Laboratory of Rare Earth Optoelectronic Materials and Devices of Zhejiang Province, Institute of Optoelectronic Materials and Devices, China Jiliang University, Hangzhou 310018, China.*

*d. Narada Power Source Co., Ltd. Hangzhou 311305, China*

*e. University of Science and Technology Beijing, Beijing 100083, China.*

## Experimental Section/Methods

*Materials Synthesis:* NASICON samples  $\text{Na}_3\text{Zr}_2\text{Si}_2\text{PO}_{12-x}\text{Ga}$  ( $x=0-0.2$ ) (NZSP-xGa) were prepared by a conventional solid-state reaction. According to the stoichiometry,  $\text{Na}_2\text{CO}_3$  (AR, 99.5%, Macklin),  $\text{ZrO}_2$  (99.99%, Macklin),  $\text{Ga}_2\text{O}_3$  (99.99%, Macklin),  $\text{SiO}_2$  (99%, Macklin) and  $\text{NH}_4\text{H}_2\text{PO}_4$  (99.99%, Macklin) were weighed and mixed. To compensate for the volatile loss of Na, about 10 wt% excess  $\text{Na}_2\text{CO}_3$  was added to the initial mixture. The powders were ball-milled ( $\text{ZrO}_2$  containers and balls) with isopropanol at 600 rpm for 12 h and dried at 60 °C for 12 h, then calcinated at 900 °C for 12 h. The obtained powders were further ball-milled for additional 12 h, followed by pressing into a pellet at 300 MPa, with extra annealing at 1100 °C for 24 h in air. All samples were covered with mother powders during sintering.

*Materials Characterization:* The crystal structure was investigated by powder X-ray diffraction (XRD) with Cu-K radiation (Empyrean PANalytical, Holland;  $\lambda=0.154$  nm). The microscopy characteristics of samples were investigated by scanning electron microscopy (SEM) and transmission electron microscopy (TEM) (JSM-7900F and JEM-F200, respectively). The chemical composition of products was studied by EDS (JSM-7900F).

*NMR Experiments:* All solid state NMR experiments were acquired on a Bruker 600 MHz (14.1 T) magnet with AVANCE NEO consoles using Bruker 3.2 mm HXY magic angle spinning (MAS) probe. The Larmor frequencies for  $^{23}\text{Na}$ ,  $^{31}\text{P}$  were determined as 158.78 MHz and 242.99 MHz, respectively. All spectra were acquired with one-pulse and were referenced to 1 M NaCl solution (0 ppm) and 85%  $\text{H}_3\text{PO}_4$  solution (0 ppm), respectively. The  $^{23}\text{Na}$  and  $^{31}\text{P}$  spin-lattice relaxation times ( $T_1$ ) were recorded using saturation recovery pulse sequence. Recycle delays were set longer than  $5 \times T_1$  for all experiments. The spinning rate  $\nu_{\text{rot}}$  was set to 14 kHz for  $^{23}\text{Na}$  and  $^{31}\text{P}$ , respectively. The varying temperature experiments were protected by  $\text{N}_2$  atmosphere. All spectra were simulated by using ssNake software<sup>[45]</sup>.

*Electrochemical Measurements:* The ionic conductivity of NZSP-xGa pellets were measured with electrochemical impedance spectroscopy (EIS) (Solartron 1260/1296 frequency response

analyzer). Silver was coated on the pellets by spreading as the blocking electrodes before conductivity measurement. The measured frequency range was 10 MHz to 1 Hz. The temperature dependence of the conductivity was measured in the same way at several specific temperatures ranging from 30 to 110 °C at a BioLogic electrochemical station (SP-300). Na/NZSP-0.15Ga/Na symmetric cells were assembled by affixing Na metal disks to each surface of NZSP-0.15Ga pellet to test the Na metal stripping/plating. Galvanostatic charge-discharge (GCD) for symmetric cells was carried out at 50  $\mu\text{A cm}^{-2}$  on a LAND CT2001A/B instrument (Wuhan, China) at room temperature and each cycle was lasted for 1 h. And the direct current (DC) polarization measurement was performed on the Na/NZSP-0.15Ga/Ag cell to obtain the electronic conductivity. Na/NZSP-0.15Ga/stainless steel asymmetrical cells were assembled to examine the electrochemical stability window. Cyclic voltammetry (CV) was tested in the voltage range of -1 to 6V at a scanning rate of 0.5  $\text{mV s}^{-1}$  using a BioLogic electrochemical station.

*Solid-state Battery Fabrication and Measurements:* 70 wt% active materials  $\text{Na}_3\text{V}_2(\text{PO}_4)_3$  (Shenzhen Huaqing New Material Technology Co., Ltd), 20 wt% acetylene black and 10 wt% PVDF were mixed in N-methyl-2-pyrrolidone (NMP). The obtained homogeneous slurry was coated on the surface of the aluminum foil and dried at 120 °C in a vacuum oven overnight. Then the electrode was punched into 12 mm diameter to obtain  $\text{Na}_3\text{V}_2(\text{PO}_4)_3$  (NVP) electrodes for electrochemical test. The mass loading of each NVP cathode was about 0.8-1.2  $\text{mg cm}^{-2}$ . NVP cathode, NZSP-0.15Ga pellet and Na metal were assembled into 2032 coin cell in an Ar-filled glovebox. The liquid  $\text{Na}^+$  electrolyte (1 M  $\text{NaClO}_4$  in EC:DMC:EMC, 1:1:1 by vol. with 5wt% FEC) was employed to improve the wettability of solid electrode-NVP cathode interface. All electrochemical tests were carried out on a LAND CT2001A/B (Wuhan, China) system. Electrochemical impedance spectroscopy (EIS) measurements were obtained on an SP-300 electrochemical station (BioLogic, France).

*DFT calculation:* The density functional theory (DFT) calculations have been conducted on Vienna ab-initio simulation package (VASP)[50,51] to study the doping process of Ga in  $\text{Na}_3\text{Zr}_2\text{Si}_2\text{PO}_{12}$  crystal. The Projector augmented wave method[51] with a cutoff energy of 400 eV accompanied by Perdew-Burke-Ernzerhof functional[52] has been used in the DFT calculations. The  $(2\times 1\times 2)$  supercell of  $\text{Na}_3\text{Zr}_2\text{Si}_2\text{PO}_{12}$  primitive cell has been used to build the doping model with one Zr-atom replaced by one Ga-atom and one Na-atom. All models have been fully relaxed with the energy convergence criterion of  $10^{-5}$  eV and the force convergence criterion of 0.02 eV/Å, respectively. The reaction energy ( $E_r$ ) has been calculated using following formula,

$$E_r = E_{\text{doping}} - E_{\text{NZSP}} - E_{\text{Ga}} + E_{\text{Zr}} - E_{\text{Na}}$$

The  $E_{\text{doping}}$ ,  $E_{\text{NZSP}}$ ,  $E_{\text{Ga}}$ ,  $E_{\text{Zr}}$  and  $E_{\text{Na}}$  represent the energy of doping model,  $\text{Na}_3\text{Zr}_2\text{Si}_2\text{PO}_{12}$  model, Ga-atom, Zr-atom and Na-atom, respectively.

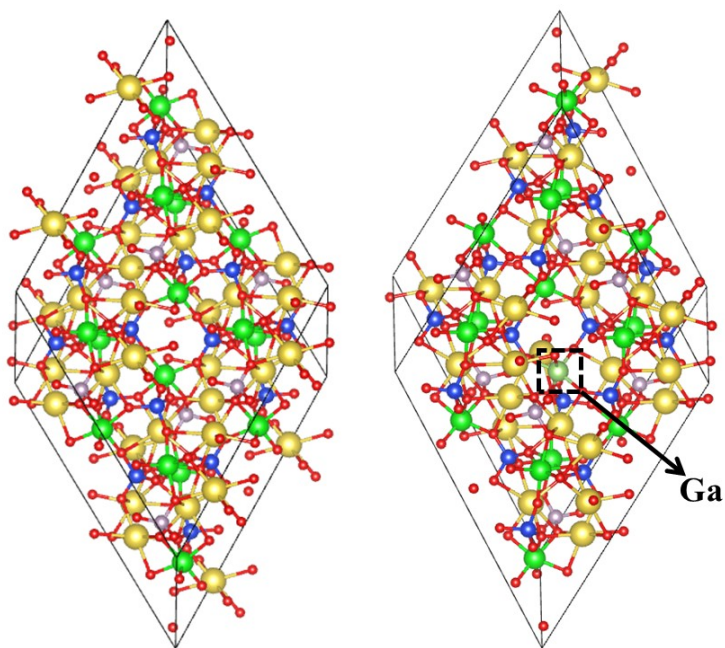

**Figure S1.** Structure of NASICON before and after introducing Ga.

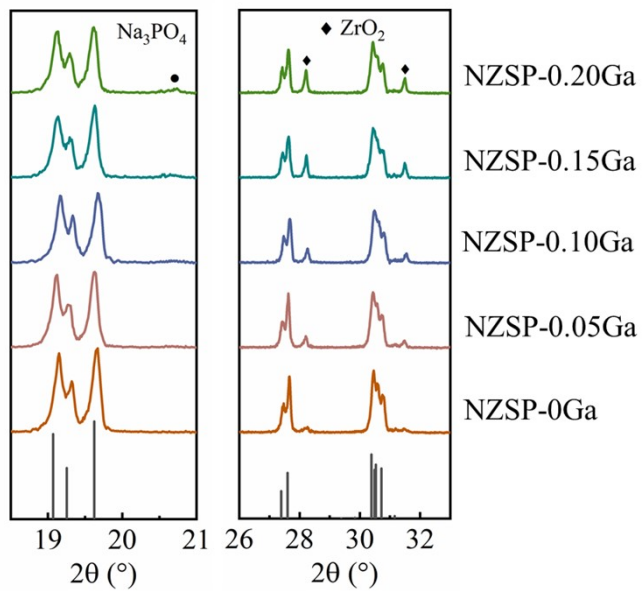

**Figure S2.** XRD patterns in the range between  $18.5^\circ$ - $21^\circ$  (c) and  $29$ - $35^\circ$ .

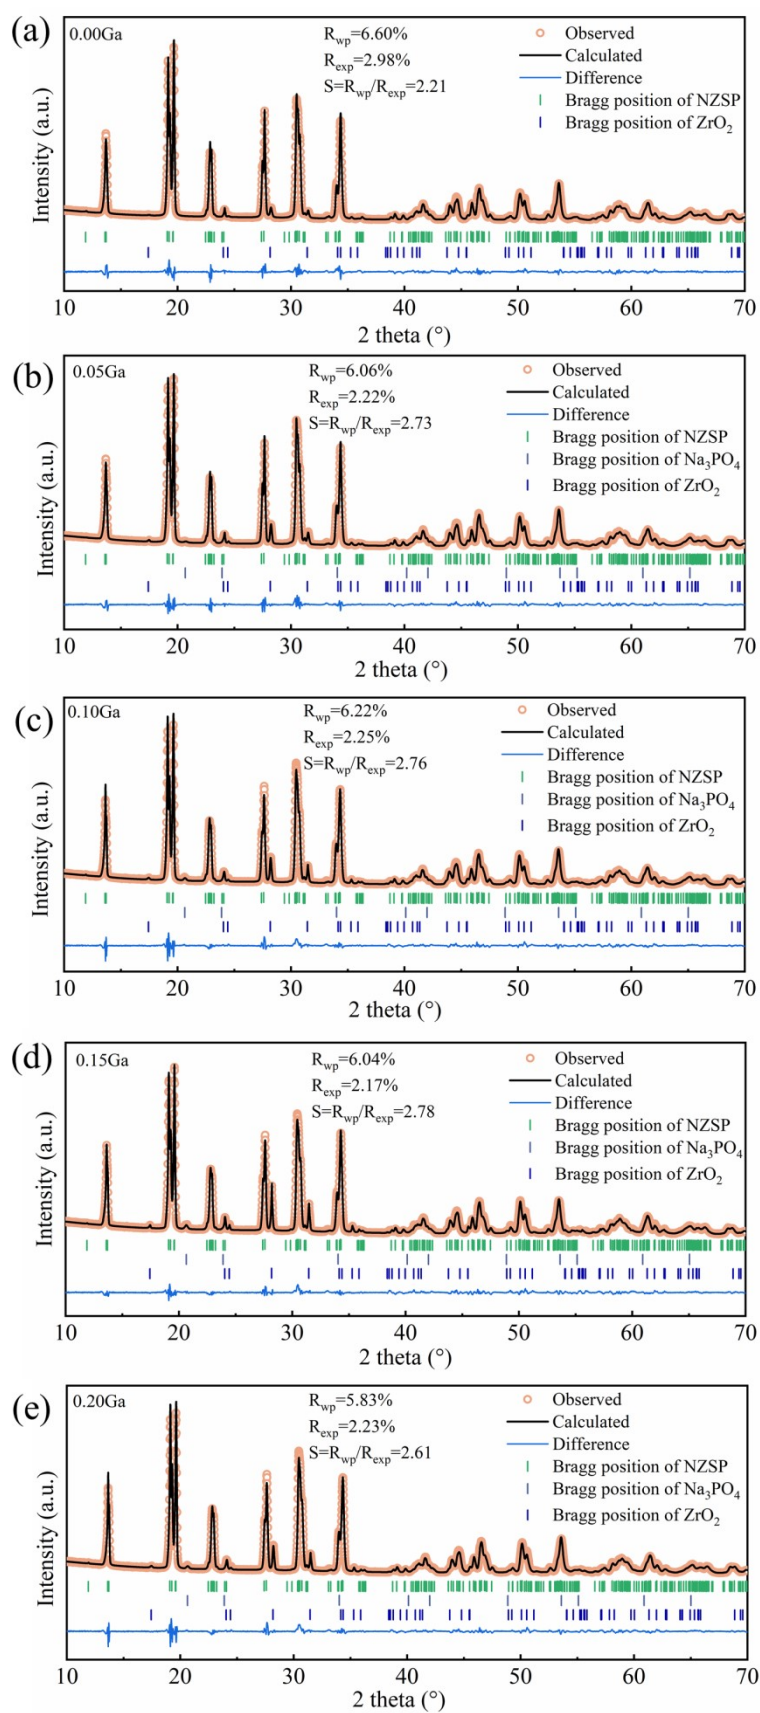

**Figure S3.** Rietveld refinement for NZSP-xGa (x=0, 0.05, 0.10, 0.15 and 0.20) based on powder XRD data.

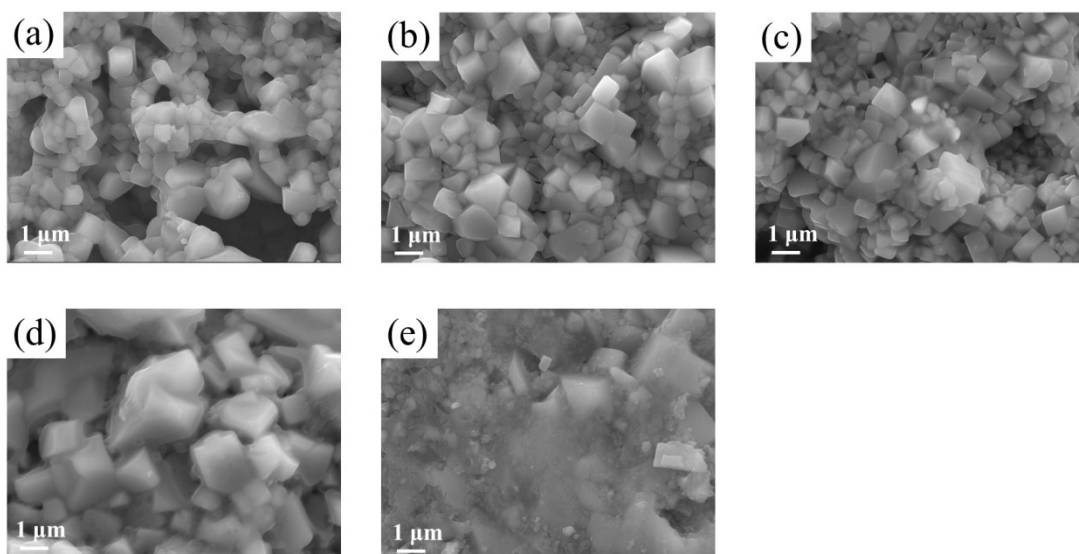

**Figure S4.** Cross-sectional SEM images of (a) NZSP-0Ga, (b) NZSP-0.05Ga, (c) NZSP-0.10Ga, (d) NZSP-0.15Ga and (e) NZSP-0.20Ga.



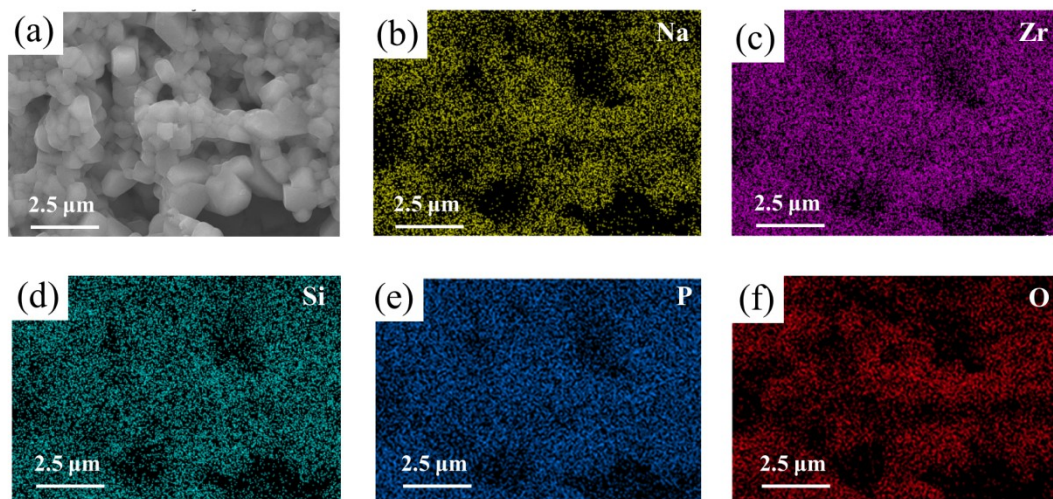

**Figure S5.** Elemental mapping of NZSP-0Ga.

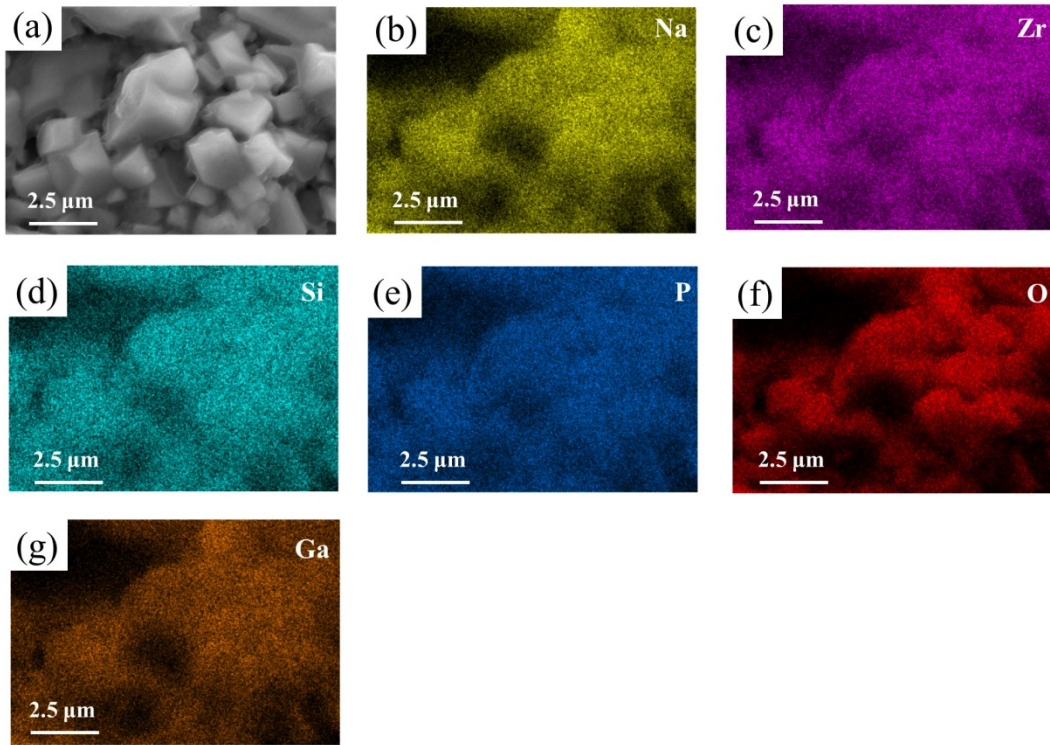

**Figure S6.** Elemental mapping of NZSP-0.15Ga.

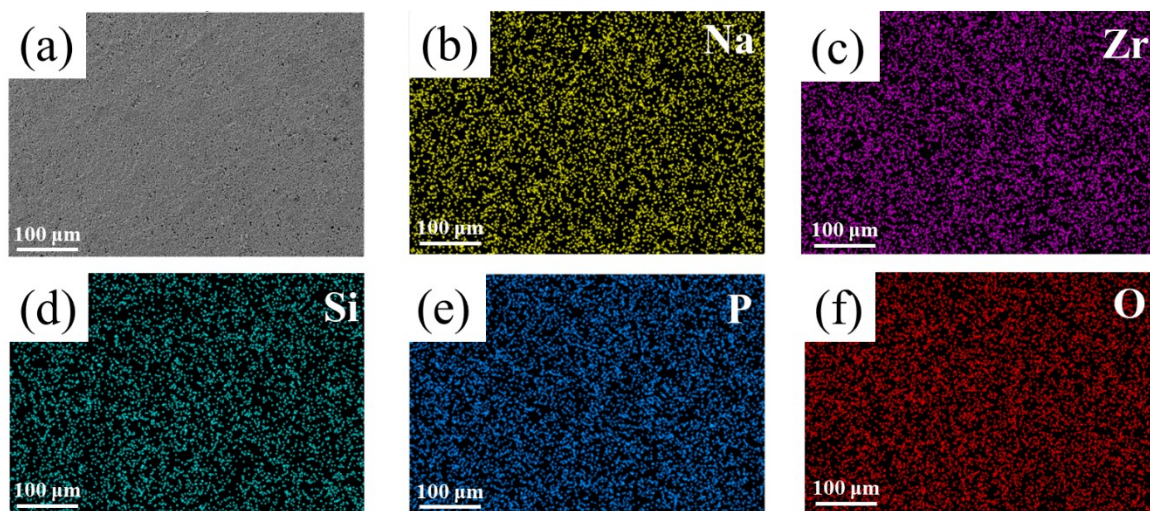

**Figure S7.** Elemental mapping with larger area of NZSP-0Ga.



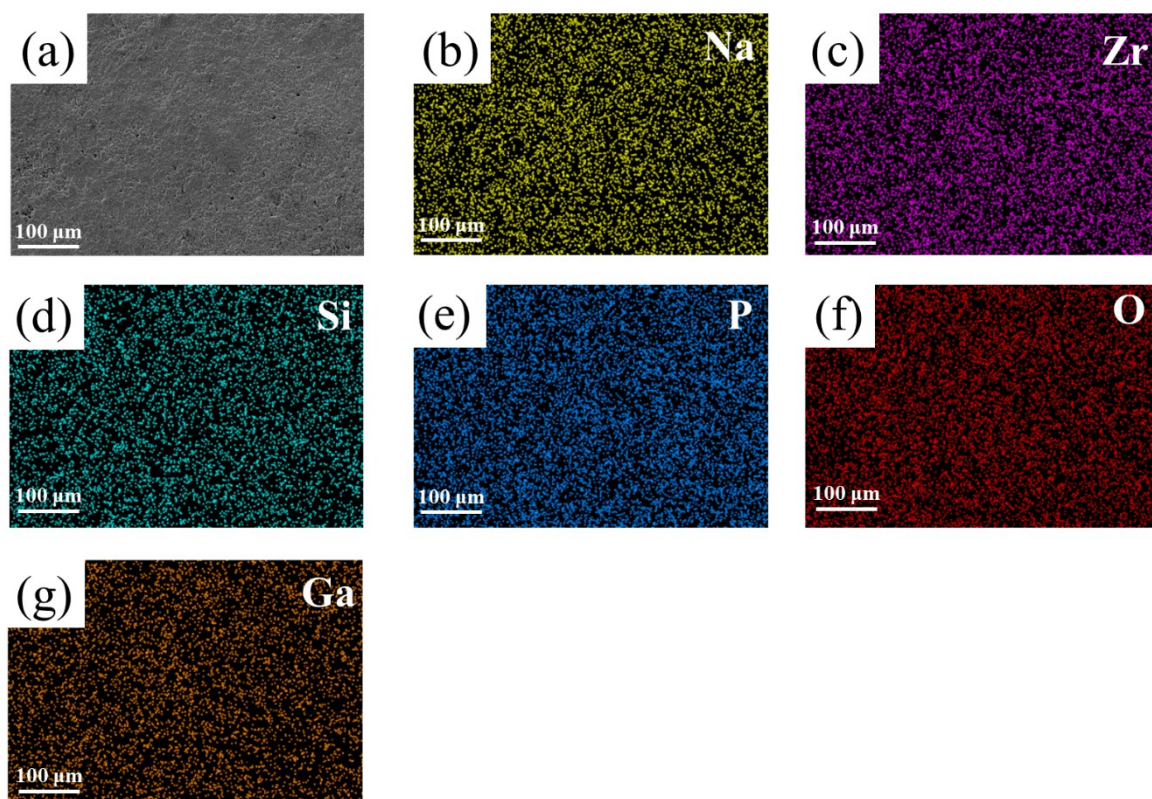

**Figure S8.** Elemental mapping with larger area of NZSP-0.15Ga.

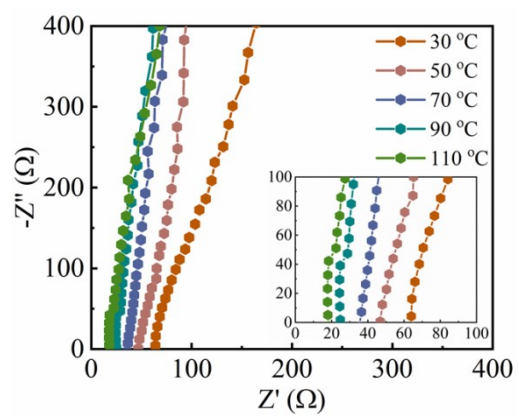

**Figure S9.** Nyquist plots of NZSP-0.15Ga at different temperatures.

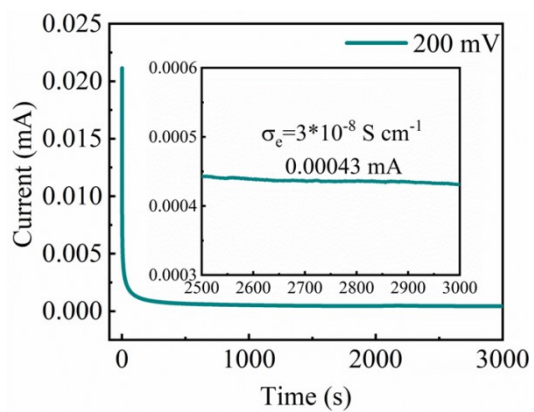

**Figure S10.** DC polarization curve for NZSP-0.15Ga under the applied voltage of 200 mV at room temperature.

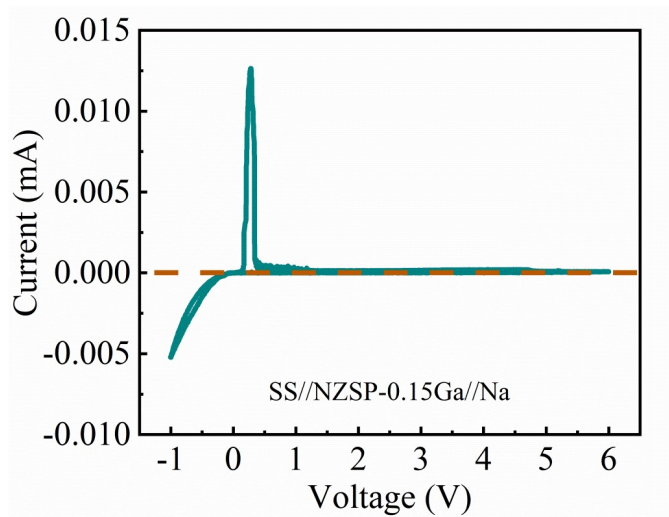

**Figure S11.** CV curve of SS/NZSP-0.15Ga/Na cell at a scanning speed of 5 mV s<sup>-1</sup>.

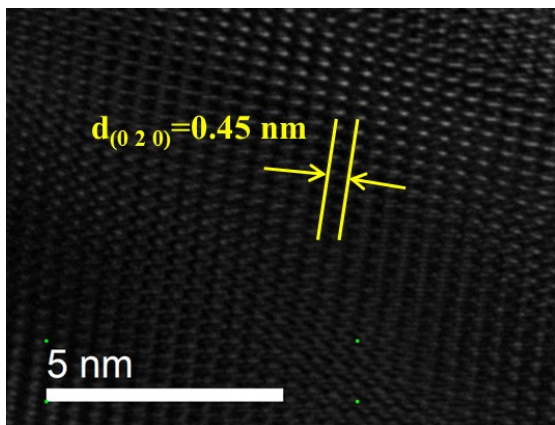

**Figure S12.** HRTEM of NZSP-0.15Ga.



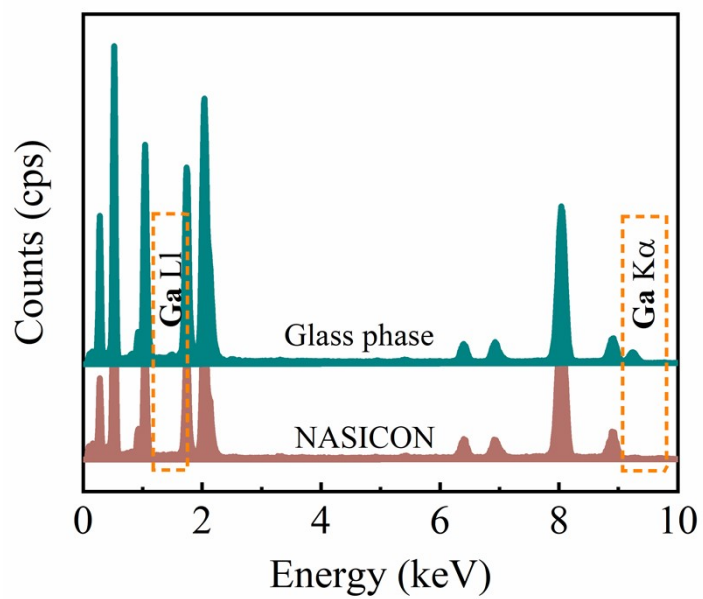

**Figure S13.** EDS point scanning of NZSP-0.15Ga.

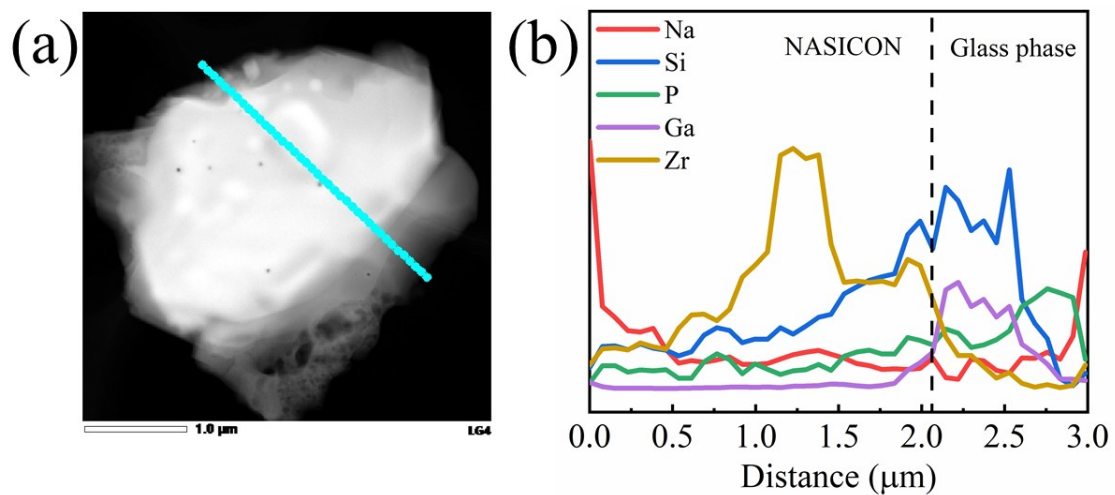

**Figure S14.** Dark-field STEM image of NZSP-0.15Ga and the EDS linear scanning. The sudden increase in Zr content is possibly due to the presence of ZrO<sub>2</sub>.

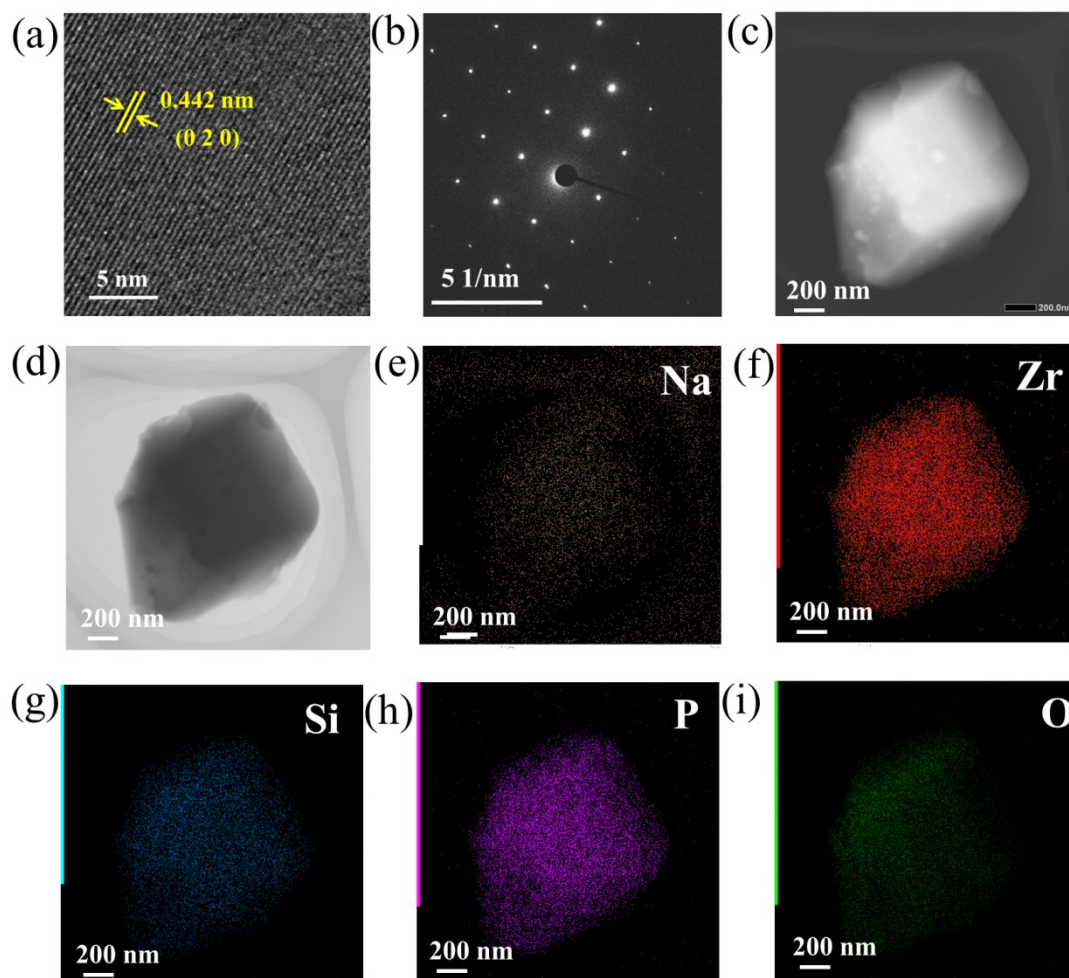

**Figure S15.** HRTEM, SAND and EDS mapping of NZSP-0Ga.

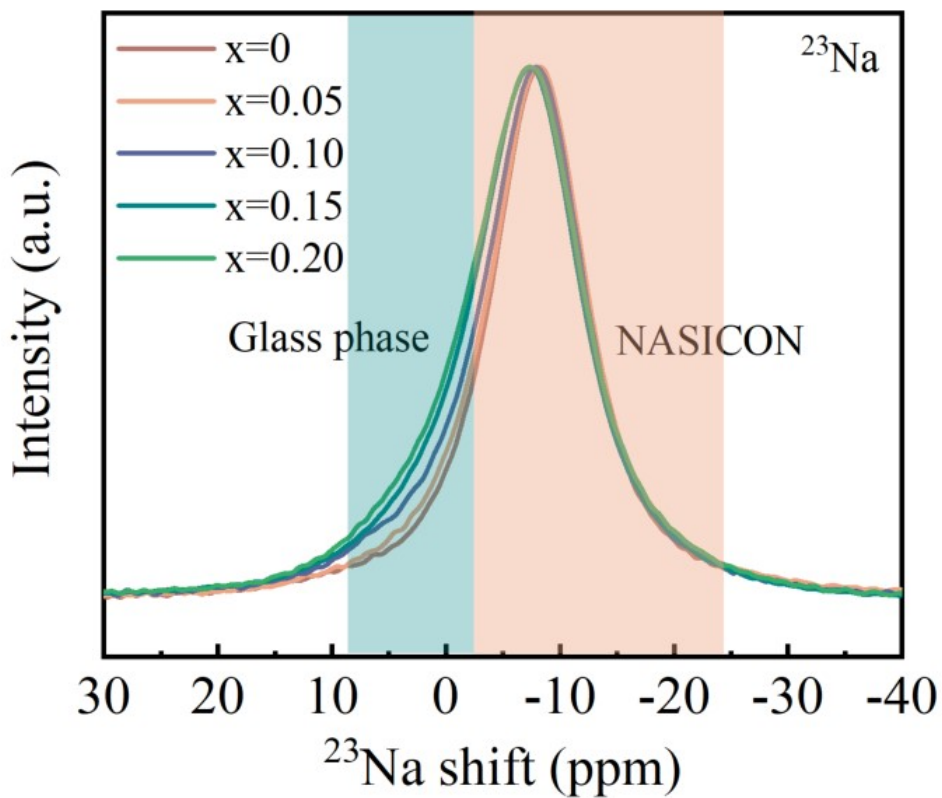

**Figure S16.**  $^{23}\text{Na}$  spectra of NZSP-xGa acquired at 14.1 T.

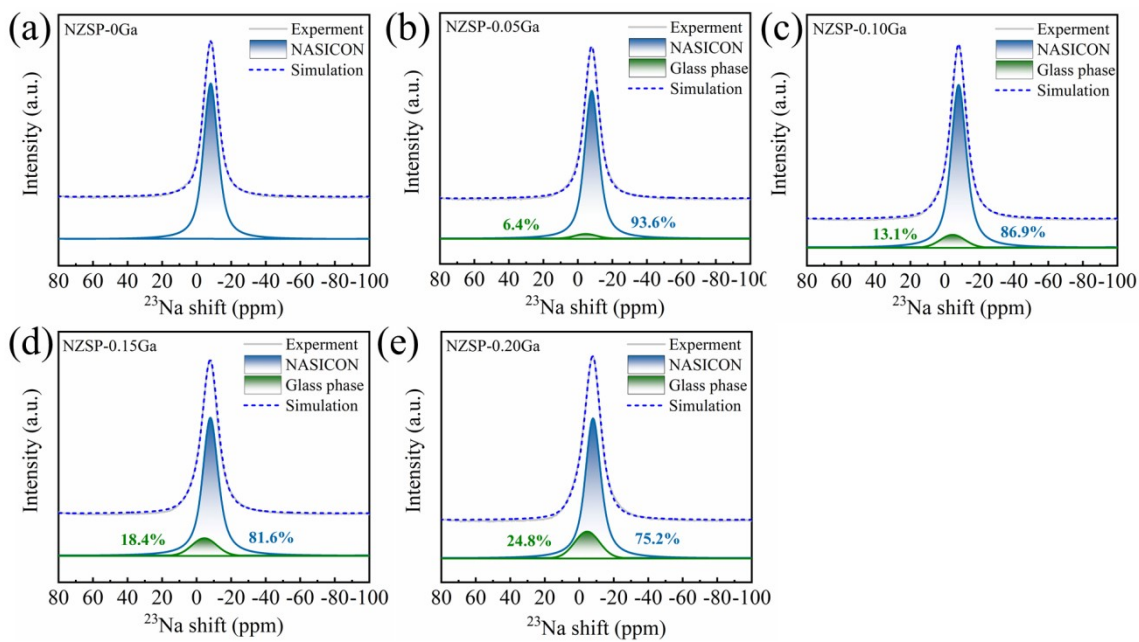

**Figure S17.**  $^{23}\text{Na}$  spectra and deconvolution of NZSP-xGa acquired at 14.1 T.

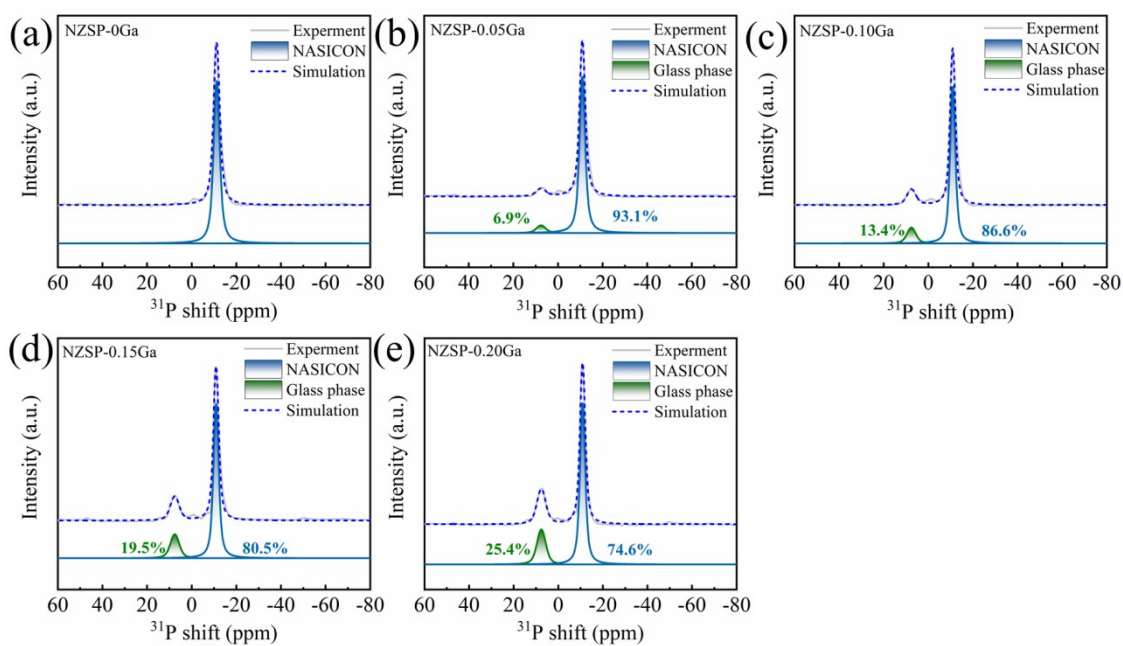

**Figure S18.**  $^{31}\text{P}$  spectra and deconvolution of NZSP-xGa acquired at 14.1 T.

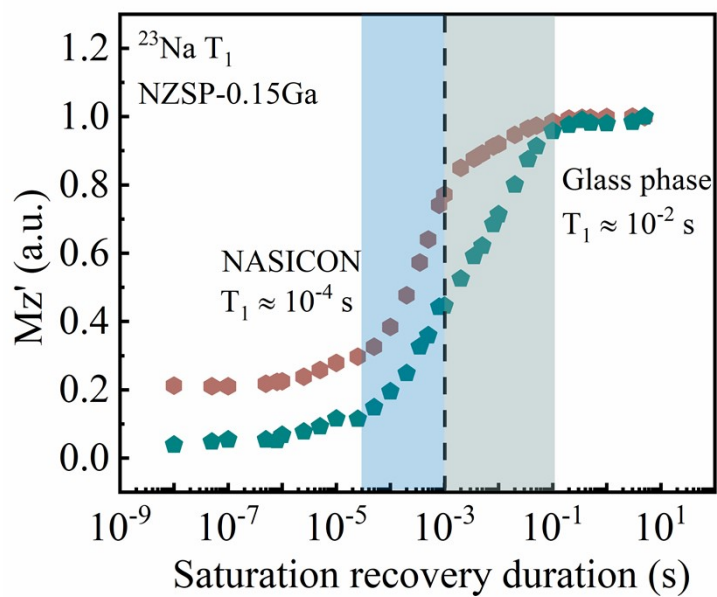

**Figure S19.**  $T_1$  of NASICON and glass phase in NZSP-0.15Ga.

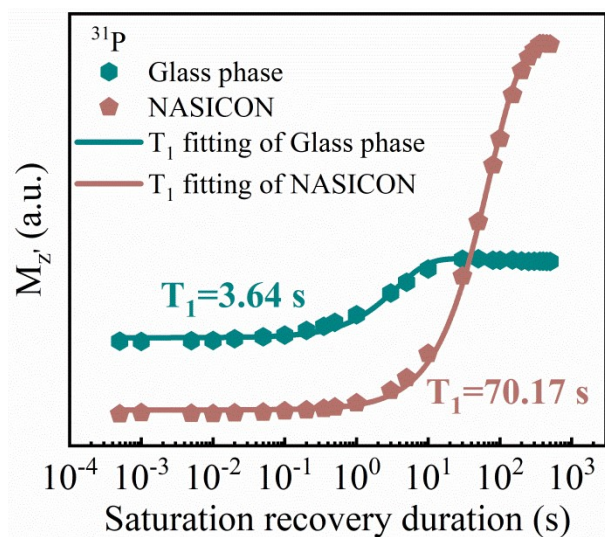

**Figure S20.** Saturation recovery fitting curves for  $^{31}\text{P}$  relaxation.



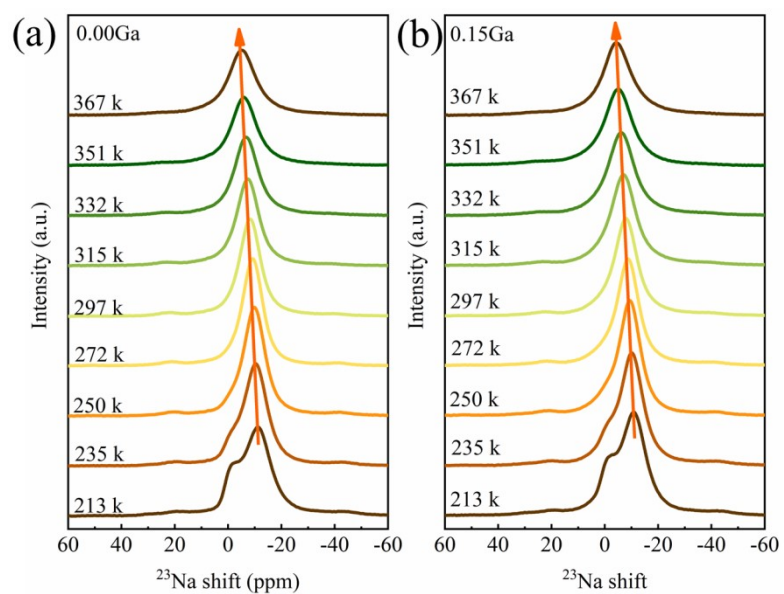

**Figure S21.** Solid-state  $^{23}\text{Na}$  NMR spectra of NZSP-0Ga and NZSP-0.15Ga at different temperatures.

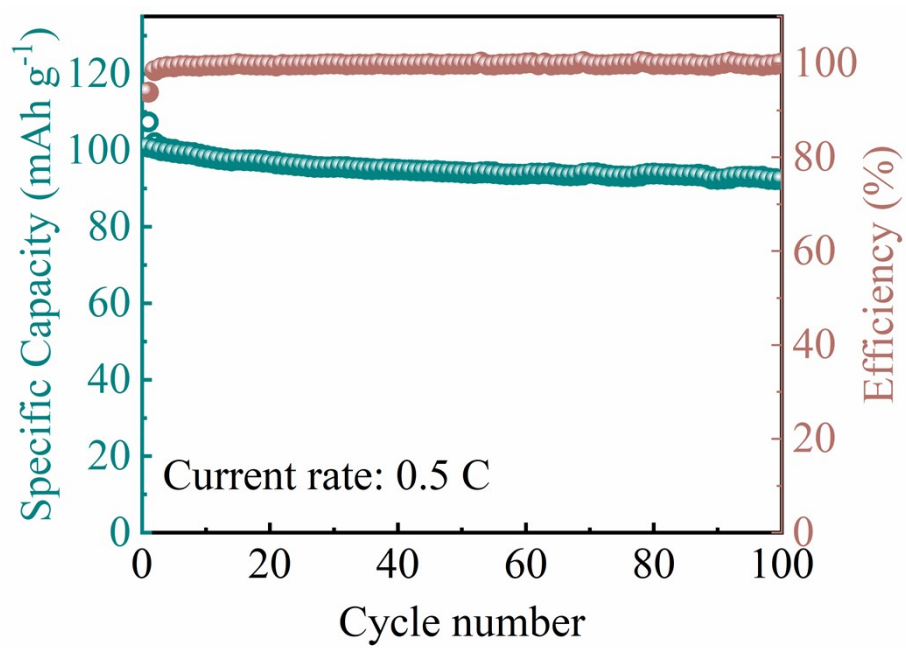

**Figure S22.** Cycling performance at 0.5 C.

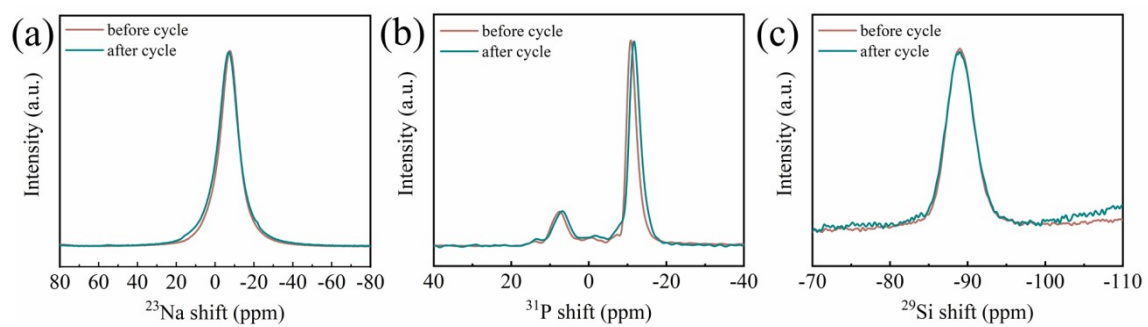

**Figure S23.** <sup>23</sup>Na, <sup>31</sup>P and <sup>29</sup>Si NMR spectra of NZSP-0.15Ga before and after cycling.

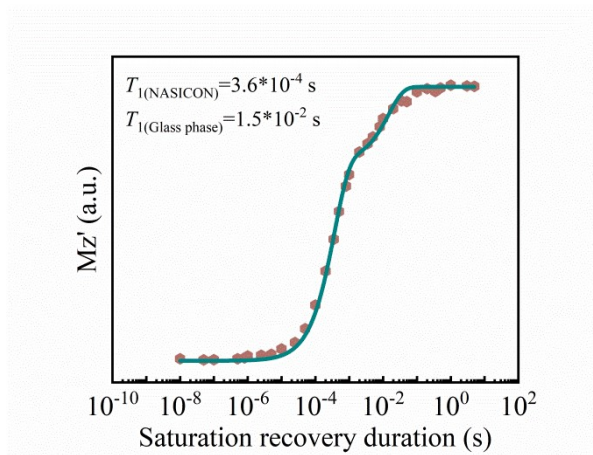

**Figure S24.**  $^{23}\text{Na}$  saturation recovery fitting curve of the cycled NZSP-0.15Ga.

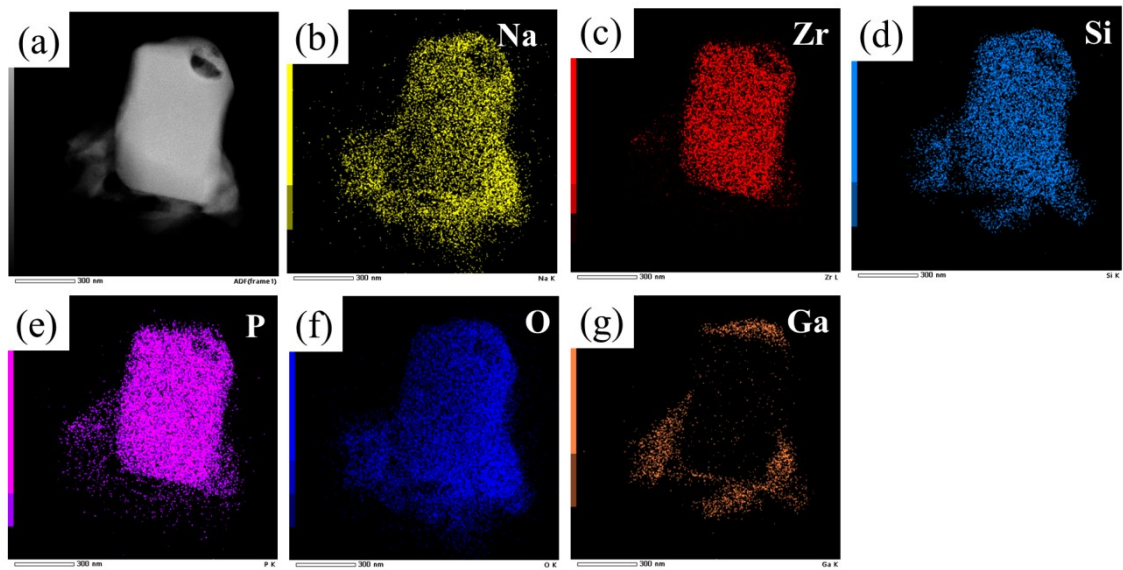

**Figure S25.** TEM and corresponding element-mapping images of NZSP-0.15Ga after 100 cycles.

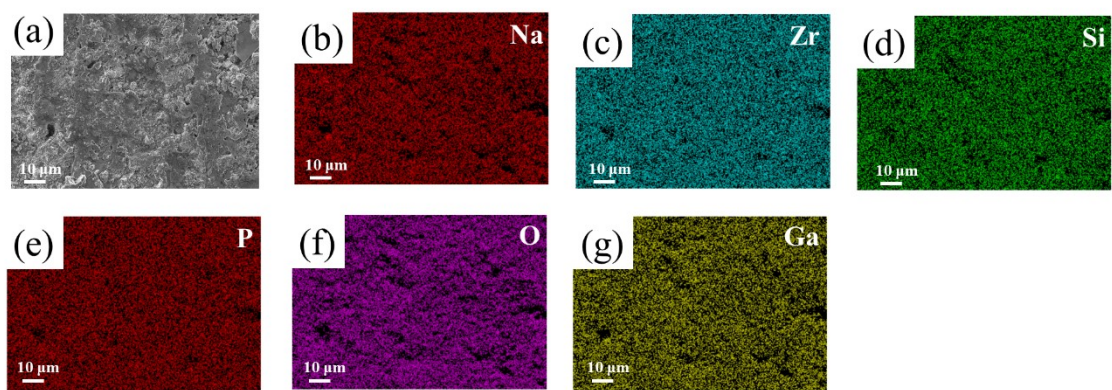

**Figure S26.** SEM and corresponding element-mapping images of NZSP-0.15Ga after 100 cycles.

Table S1. The calculated formation energies of NZSP, NZSP-Ga, Na, Ga and Zr from DFT.

| Samples                                                     | Formation Energy(eV) |
|-------------------------------------------------------------|----------------------|
| $\text{Na}_3\text{Zr}_2\text{Si}_2\text{PO}_{12}$           | -1217.431            |
| $\text{Na}_3\text{Zr}_2\text{Si}_2\text{PO}_{12}\text{-Ga}$ | -1210.063            |
| Na                                                          | -0.022               |
| Ga                                                          | -0.035               |
| Zr                                                          | -1.281               |

$$E_{(\text{reaction energy})} = E_{(\text{doping})} - E_{(\text{NZSP})} - E_{(\text{Ga})} + E_{(\text{Zr})} - E_{(\text{Na})} = -1210.063 - (-1217.431) - (-0.035) + (-1.281) - (-0.022) = 6.144 \text{ eV}$$

**Table S2.** Crystallographic data for the prepared NZSP-0.15Ga.

| Crystal System    | Monoclinic                         |         |         |         |           |
|-------------------|------------------------------------|---------|---------|---------|-----------|
| Space Group       | C2/c                               |         |         |         |           |
| Lattice Parameter | a = 15.670330, b = 9.065409 Å, c = |         |         |         |           |
| Volume            | 9.216213 Å                         |         |         |         |           |
|                   | V = 1086.997 Å <sup>3</sup>        |         |         |         |           |
| Atoms             | wyckoff<br>positions               | x       | y       | z       | Occupancy |
| Na1               | 4d                                 | 0.25000 | 0.25000 | 0.50000 | 0.81000   |
| Na2               | 4e                                 | 0.50000 | 0.90000 | 0.25000 | 1.00000   |
| Na3               | 8f                                 | 0.82925 | 0.07614 | 0.84174 | 0.60000   |
| Zr1               | 8f                                 | 0.10092 | 0.24738 | 0.05477 | 1.00404   |
| Ga1               | 8f                                 | 0.10092 | 0.24738 | 0.05477 | -0.00404  |
| Si1               | 4e                                 | 0.00000 | 0.02951 | 0.25000 | 0.67000   |
| Si2               | 8f                                 | 0.34724 | 0.09152 | 0.24800 | 0.67000   |
| P1                | 4e                                 | 0.00000 | 1.03127 | 0.25000 | 0.33000   |
| P2                | 8f                                 | 0.36440 | 0.13262 | 0.27428 | 0.33000   |
| O1                | 8f                                 | 0.15194 | 0.43329 | 0.22642 | 1.00000   |
| O2                | 8f                                 | 0.43228 | 0.44810 | 0.08322 | 1.00000   |
| O3                | 8f                                 | 0.25995 | 0.17807 | 0.21762 | 1.00000   |
| O4                | 8f                                 | 0.38203 | 0.13336 | 0.11787 | 1.00000   |
| O5                | 8f                                 | 0.45195 | 0.17250 | 0.45009 | 1.00000   |
| O6                | 8f                                 | 0.08796 | 0.12916 | 0.24874 | 1.00000   |



**Table S3.** Crystallographic data for the prepared NZSP-0Ga.

| Crystal System    | Monoclinic                         |         |         |         |           |
|-------------------|------------------------------------|---------|---------|---------|-----------|
| Space Group       | C2/c                               |         |         |         |           |
| Lattice Parameter | a = 15.664660, b = 9.058880 Å, c = |         |         |         |           |
| Volume            | 9.217207 Å                         |         |         |         |           |
|                   | V = 1086.298 Å <sup>3</sup>        |         |         |         |           |
| Atoms             | wyckoff<br>positions               | x       | y       | z       | Occupancy |
| Na1               | 4d                                 | 0.25000 | 0.25000 | 0.50000 | 0.81000   |
| Na2               | 4e                                 | 0.50000 | 0.89710 | 0.25000 | 1.00000   |
| Na3               | 8f                                 | 0.83151 | 0.08192 | 0.83788 | 0.60000   |
| Zr1               | 8f                                 | 0.10133 | 0.24925 | 0.05587 | 1.00000   |
| Si1               | 4e                                 | 0.00000 | 0.02599 | 0.25000 | 0.67000   |
| Si2               | 8f                                 | 0.34807 | 0.09685 | 0.24922 | 0.67000   |
| P1                | 4e                                 | 0.00000 | 0.05499 | 0.25000 | 0.33000   |
| P2                | 8f                                 | 0.37693 | 0.14245 | 0.29205 | 0.33000   |
| O1                | 8f                                 | 0.15745 | 0.44017 | 0.22477 | 1.00000   |
| O2                | 8f                                 | 0.42917 | 0.45051 | 0.07746 | 1.00000   |
| O3                | 8f                                 | 0.25771 | 0.17599 | 0.20972 | 1.00000   |
| O4                | 8f                                 | 0.38298 | 0.13555 | 0.11628 | 1.00000   |
| O5                | 8f                                 | 0.45599 | 0.17413 | 0.45740 | 1.00000   |
| O6                | 8f                                 | 0.08627 | 0.13964 | 0.23914 | 1.00000   |

**Table S4.** Crystallographic data for the prepared NZSP-0.05Ga.

| Crystal System    | Monoclinic                         |         |         |         |           |
|-------------------|------------------------------------|---------|---------|---------|-----------|
| Space Group       | C2/c                               |         |         |         |           |
| Lattice Parameter | a = 15.661112, b = 9.058272 Å, c = |         |         |         |           |
| Volume            | 9.219478 Å                         |         |         |         |           |
|                   | V = 1086.388 Å <sup>3</sup>        |         |         |         |           |
| Atoms             | wyckoff<br>positions               | x       | y       | z       | Occupancy |
| Na1               | 4d                                 | 0.25000 | 0.25    | 0.5     | 0.81      |
| Na2               | 4e                                 | 0.50000 | 0.89693 | 0.25000 | 1.00000   |
| Na3               | 8f                                 | 0.82833 | 0.07734 | 0.83951 | 0.60000   |
| Zr1               | 8f                                 | 0.10138 | 0.24860 | 0.05568 | 0.99409   |
| Ga1               | 8f                                 | 0.10138 | 0.24860 | 0.05568 | 0.00591   |
| Si1               | 4e                                 | 0.0000  | 0.02803 | 0.25000 | 1.03626   |
| Si2               | 8f                                 | 0.35227 | 0.10550 | 0.25444 | 0.96739   |
| P1                | 4e                                 | 0.00000 | 1.07576 | 0.25000 | 0.09890   |
| P2                | 8f                                 | 0.38811 | 0.19263 | 0.33870 | 0.13521   |
| O1                | 8f                                 | 0.15300 | 0.44035 | 0.23071 | 1.00000   |
| O2                | 8f                                 | 0.43001 | 0.44873 | 0.07929 | 1.00000   |
| O3                | 8f                                 | 0.25721 | 0.17857 | 0.21130 | 1.00000   |
| O4                | 8f                                 | 0.38145 | 0.13664 | 0.11916 | 1.00000   |
| O5                | 8f                                 | 0.45406 | 0.17598 | 0.45500 | 1.00000   |
| O6                | 8f                                 | 0.08655 | 0.13174 | 0.24446 | 1.00000   |

**Table S5.** Crystallographic data for the prepared NZSP-0.10Ga.

| Crystal System    | Monoclinic                                             |         |         |         |           |
|-------------------|--------------------------------------------------------|---------|---------|---------|-----------|
| Space Group       | C2/c                                                   |         |         |         |           |
| Lattice Parameter | a = 15.670330, b = 9.065409 Å, c =                     |         |         |         |           |
| Volume            | 9.216213 Å <sup>3</sup><br>V = 1086.997 Å <sup>3</sup> |         |         |         |           |
| Atoms             | wyckoff<br>positions                                   | x       | y       | z       | Occupancy |
| Na1               | 4d                                                     | 0.25000 | 0.25000 | 0.50000 | 0.81000   |
| Na2               | 4e                                                     | 0.50000 | 0.89981 | 0.25000 | 1.00000   |
| Na3               | 8f                                                     | 0.82732 | 0.08268 | 0.84023 | 0.60000   |
| Zr1               | 8f                                                     | 0.10125 | 0.24809 | 0.05528 | 0.99930   |
| Ga1               | 8f                                                     | 0.10125 | 0.24809 | 0.05528 | 0.00070   |
| Si1               | 4e                                                     | 0.00000 | 0.02886 | 0.25000 | 0.67000   |
| Si2               | 8f                                                     | 0.34627 | 0.09440 | 0.24828 | 0.67000   |
| P1                | 4e                                                     | 0.00000 | 1.04819 | 0.25000 | 0.33000   |
| P2                | 8f                                                     | 0.36972 | 0.13584 | 0.27819 | 0.33000   |
| O1                | 8f                                                     | 0.15311 | 0.43892 | 0.22673 | 1.00000   |
| O2                | 8f                                                     | 0.43056 | 0.44862 | 0.08146 | 1.00000   |
| O3                | 8f                                                     | 0.25876 | 0.17865 | 0.21496 | 1.00000   |
| O4                | 8f                                                     | 0.38202 | 0.13352 | 0.12061 | 1.00000   |
| O5                | 8f                                                     | 0.45080 | 0.17425 | 0.45036 | 1.00000   |
| O6                | 8f                                                     | 0.08663 | 0.13094 | 0.24490 | 1.00000   |

**Table S6.** Crystallographic data for the prepared NZSP-0.20Ga.

| Crystal System    | Monoclinic                                             |         |         |         |           |
|-------------------|--------------------------------------------------------|---------|---------|---------|-----------|
| Space Group       | C2/c                                                   |         |         |         |           |
| Lattice Parameter | a = 15.670330, b = 9.065409 Å, c =                     |         |         |         |           |
| Volume            | 9.216213 Å <sup>3</sup><br>V = 1086.997 Å <sup>3</sup> |         |         |         |           |
| Atoms             | wyckoff<br>positions                                   | x       | y       | z       | Occupancy |
| Na1               | 4d                                                     | 0.25000 | 0.25000 | 0.50000 | 0.81000   |
| Na2               | 4e                                                     | 0.50000 | 0.89923 | 0.25000 | 1.00000   |
| Na3               | 8f                                                     | 0.83134 | 0.07555 | 0.84094 | 0.60000   |
| Zr1               | 8f                                                     | 0.10071 | 0.24708 | 0.05447 | 0.92149   |
| Ga1               | 8f                                                     | 0.10071 | 0.24708 | 0.05447 | 0.07851   |
| Si1               | 4e                                                     | 0.00000 | 0.03684 | 0.25000 | 0.67000   |
| Si2               | 8f                                                     | 0.34600 | 0.09234 | 0.24695 | 0.67000   |
| P1                | 4e                                                     | 0.00000 | 1.02766 | 0.25000 | 0.33000   |
| P2                | 8f                                                     | 0.36730 | 0.13017 | 0.27251 | 0.33000   |
| O1                | 8f                                                     | 0.15415 | 0.43275 | 0.22797 | 1.00000   |
| O2                | 8f                                                     | 0.42995 | 0.44732 | 0.08129 | 1.00000   |
| O3                | 8f                                                     | 0.26014 | 0.17987 | 0.22029 | 1.00000   |
| O4                | 8f                                                     | 0.38167 | 0.13167 | 0.11631 | 1.00000   |
| O5                | 8f                                                     | 0.45315 | 0.17324 | 0.45223 | 1.00000   |
| O6                | 8f                                                     | 0.08795 | 0.12740 | 0.24914 | 1.00000   |

**Table S7.** Activation energy of NZSP-xGa samples from AC impedance analysis.

| Samples | Activation energy (eV) |
|---------|------------------------|
| x=0.05  | 0.22                   |
| x=0.10  | 0.18                   |
| x=0.15  | 0.16                   |
| x=0.20  | 0.17                   |

**Table S8.** Simulations results from  $^{23}\text{Na}$  NMR data.

| Samples | Phase       | Shift (ppm) | $C_Q$ | $\eta$ | Population |
|---------|-------------|-------------|-------|--------|------------|
| x=0.00  | NASICON     | -3.3        | 2     | 0.8    | 100%       |
| x=0.05  | NASICON     | -3.4        | 2     | 0.8    |            |
|         | Glass phase | -0.2        | 1.9   | 0.8    | 6.4%       |
| x=0.10  | NASICON     | -3.4        | 2     | 0.8    |            |
|         | Glass phase | -0.2        | 1.9   | 0.8    | 13.1%      |
| x=0.15  | NASICON     | -3.5        | 2     | 0.8    |            |
|         | Glass phase | -0.2        | 1.9   | 0.8    | 18.4%      |
| x=0.20  | NASICON     | -3.5        | 2     | 0.8    |            |
|         | Glass phase | -0.2        | 1.9   | 0.8    | 24.8%      |

**Table S9.** Simulations results from  $^{31}\text{P}$  NMR data.

| Samples | Phase       | Shift (ppm) | Population |
|---------|-------------|-------------|------------|
| x=0.00  | NASICON     | -11.2       | 100%       |
| x=0.05  | NASICON     | -11.0       |            |
|         | Glass phase | 7.6         | 6.9%       |
| x=0.10  | NASICON     | -11.0       |            |
|         | Glass phase | 7.6         | 13.4%      |
| x=0.15  | NASICON     | -11.0       |            |
|         | Glass phase | 7.6         | 19.5%      |
| x=0.20  | NASICON     | -11.0       |            |
|         | Glass phase | 7.6         | 25.4%      |

**Table S10.** A survey of electrochemical performances of Na<sub>3</sub>Zr<sub>2</sub>Si<sub>2</sub>PO<sub>12</sub>-based symmetric batteries.

| Electrolytes                                                                                                                | Operating temperature | Current densities (mA cm <sup>-2</sup> ) | Cycle time | Ref.                                                   |
|-----------------------------------------------------------------------------------------------------------------------------|-----------------------|------------------------------------------|------------|--------------------------------------------------------|
| Na <sub>3</sub> Zr <sub>2</sub> Si <sub>2</sub> PO <sub>12</sub> -0.15Ga                                                    | RT                    | 0.2                                      | 800 h      | This work                                              |
|                                                                                                                             |                       | 0.4                                      | 200 h      |                                                        |
| Na <sub>3.125</sub> Zr <sub>1.75</sub> Sc <sub>0.125</sub> Ge <sub>0.12</sub> <sub>5</sub> Si <sub>2</sub> PO <sub>12</sub> | RT                    | 0.2                                      | 500 h      | Energy Storage Materials 40 (2021) 282–291             |
| Na <sub>3</sub> Zr <sub>2</sub> Si <sub>2</sub> PO <sub>12</sub>                                                            | RT                    | 0.1                                      | 800 h      | ACS Appl. Energy Mater. 2020, 3, 7427–7437             |
| SnO <sub>x</sub> /Sn-Na <sub>3</sub> Zr <sub>2</sub> Si <sub>2</sub> PO <sub>12</sub>                                       | RT                    | 0.1                                      | 1500 h     | Small Methods 2021, 2100339                            |
|                                                                                                                             |                       | 0.3                                      | 500 h      |                                                        |
| Na <sub>3</sub> Zr <sub>2</sub> Si <sub>2</sub> PO <sub>12</sub> -0.10MgF <sub>2</sub>                                      | 27 °C                 | 0.5                                      | 100 h      | ChemElectroChem, 2020, 7(9): 2087-2094.                |
| Na <sub>3</sub> Zr <sub>2</sub> Si <sub>2</sub> PO <sub>12</sub> -with 450 °C heat treatment                                | RT                    | 0.3                                      | 250 h      | Chem. Mater. 2020, 32, 3970–3979                       |
| Na <sub>3.4</sub> Zr <sub>1.6</sub> Sc <sub>0.4</sub> Si <sub>2</sub> PO <sub>12</sub>                                      | 25 °C                 | 0.1                                      | 800 h      | Cell Reports Physical Science 2, 100478, July 21, 2021 |
|                                                                                                                             |                       | 0.2                                      | 700 h      |                                                        |
| Na <sub>3</sub> Zr <sub>2</sub> Si <sub>2</sub> PO <sub>12</sub>                                                            | 25 °C                 | 0.1                                      | 2000 h     | Small <b>2021</b> , 2100974                            |
|                                                                                                                             | 25 °C                 | 0.2                                      | 1000 h     |                                                        |
| Na <sub>3.2</sub> Zr <sub>1.9</sub> Ca <sub>0.1</sub> Si <sub>2</sub> PO <sub>12</sub>                                      | 25 °C                 | 0.3                                      | 400 h      | Adv. Energy Mater. 2019, 1901205                       |
